# Supplementary material
Source: publisher site journal article supplement (https://www.dovepress.com/article/243614)
Supplement: Supplementary file 1 [file get_supplementary_file.php]

**Supplementary materials**

**Supplementary material 1**

**Six factors model clinical learning evaluation questionnaire (CLEQ) for undergraduate medical education**

**Cases:**

1. I have seen a sufficient number of clinical cases.
2. I have seen a sufficient number of new clinical cases.
3. I have seen a good variety of clinical cases.
4. I have seen many interesting clinical cases.
5. I have seen some cases with positive clinical findings.
6. I have seen some unusual/rare clinical cases.
7. I have the opportunity to have the first contact experiences with patients.
8. I have the opportunity to apply my previous knowledge in patient care.

**Authenticity of clinical experiences:**

1. I am actively involved in the patient care.
2. I have the opportunity to deal with patient as a real doctor.
3. I have the opportunity to deal with the patient as a whole and not limited to a certain system or organ.
4. I have the opportunity to take responsibility for patient care.
5. The objectives of the clinical rotations are clear.
6. Students have some input for the organization and development of the clinical rotations.
7. I have the opportunity to prepare before the clinical encounter.
8. I have the opportunity to reflect and read after the clinical encounter.

**Supervision:**

1. My supervisors have good communication skills.
2. I have been respected by my supervisors.
3. The supervisors are committed for teaching.
4. The way my supervisors deal with medical students is satisfactory.
5. I think supervisors have good teaching skills.
6. I have the opportunity to discuss clinical cases with my supervisors.
7. I think the assessment of the clinical learning is aligned with objectives.
8. I was given enough assignments during my clinical rotation.

**Organization of the doctor-patient encounter:**

1. I have the opportunity to share the clinical cases with other students.
2. The number of students in the clinical sessions is appropriate.
3. The time spent with my patients is adequate for my clinical learning.
4. I have the opportunity to utilize skills lab and simulation for clinical cases.

**Motivation to learn:**

1. I am eager to learn.
2. I am able to look for new information
3. I come to the clinical sessions prepared and ready.
4. I enjoy learning in clinical sessions.
5. I am able to express myself and show confidence

**Self-awareness:**

1. I have the opportunity to apply a patient-centered approach
2. I think that some supervisors could be considered as role models.
3. I adequately know my learning needs
4. I know my limitations.

**Supplementary material 2**

**Four factors clinical learning evaluation questionnaire (CLEQ) for undergraduate medical education**

**Cases (4)**

1. I have seen a sufficient number of clinical cases. (C1)
2. I have seen a good variety of clinical cases. (c3)
3. I have seen many interesting clinical cases. (c4)
4. I have seen some unusual/rare clinical cases. (c6)

**Motivation to learn: (5)**

1. I enjoy learning in clinical sessions. (m4)
2. I am able to express myself and show confidence. (m5)
3. I think that some supervisors could be considered as role models. (self2)
4. I adequately know my learning needs. (self3)
5. I know my limitations. (self4)

**Supervision (4)**

1. My supervisors have good communication skills. (s1)
2. The way my supervisors deal with medical students is satisfactory. (s4)
3. I think supervisors have good teaching skills. (s5)
4. I have the opportunity to discuss clinical cases with my supervisors. (s6)

**Organization of the doctor-patient encounters: (5)**

1. The number of students in the clinical sessions is appropriate. (O2)
2. The time spent with my patients is adequate for my clinical learning. (O3)
3. I think the assessment of the clinical learning is aligned with objectives. (s7)
4. Students have some input for the organization and development of the clinical rotations. (auth6)
5. I have the opportunity to prepare before the clinical encounter. (auth7)
